# Supplementary material
Source: ML conference proceedings conference paper supplement (https://proceedings.neurips.cc/paper_files/paper/2022/hash/819b8452be7d6af1351d4c4f9cbdbd9b-Abstract.html)
Supplement: Supplementary file 1 [file 819b8452be7d6af1351d4c4f9cbdbd9b-Supplemental-Datasets_and_Benchmarks.zip]

Archive with 2 entries (2 files):
- Appendix.pdf
- Document.pdf
